# Supplementary material for: Trivalent and quadrivalent seasonal influenza vaccine in adults aged 60 and older: a systematic review and network meta-analysis
Source: HighWire-hosted journal article supplement (doi:10.1136/bmjebm-2023-112767), 2024-04-10
Supplement: bmjebm-2023-112767supp003_data_supplement.pdf [file bmjebm-2023-112767supp003_data_supplement.pdf]

**GRIPP2 Checklist – Long Form**

| Section and topic                   | Item                                                                                                  | Reported on page No |
|-------------------------------------|-------------------------------------------------------------------------------------------------------|---------------------|
| Section 1: Abstract of paper        |                                                                                                       |                     |
| 1a: Aim                             | Report the aim of the study                                                                           | 4                   |
| 1b: Methods                         | Describe the methods used by which patients and the public were involved                              | 4                   |
| 1c: Results                         | Report the impacts and outcomes of PPI in the study                                                   | N/A                 |
| 1d: Conclusions                     | Summarise the main conclusions of the study                                                           | 5                   |
| 1e: Keywords                        | Include PPI, “patient and public involvement,” or alternative terms as keywords                       | 5                   |
| Section 2: Background to paper      |                                                                                                       |                     |
| 2a: Definition                      | Report the definition of PPI used in the study and how it links to comparable studies                 | N/A                 |
| 2b: Theoretical underpinnings       | Report the theoretical rationale and any theoretical influences relating to PPI in the study          | N/A                 |
| 2c: Concepts and theory development | Report any conceptual or theoretical models, or influences, used in the study                         | N/A                 |
| Section 3: Aims of paper            |                                                                                                       |                     |
| 3: Aim                              | Report the aim of the study                                                                           | 8                   |
| Section 4: Methods of paper         |                                                                                                       |                     |
| 4a: Design                          | Provide a clear description of methods by which patients and the public were involved                 | 9                   |
| 4b: People involved                 | Provide a description of patients, carers, and the public involved with the PPI activity in the study | 9                   |
| 4c: Stages of involvement           | Report on how PPI is used at different stages of the study                                            | 9                   |
| 4d: Level or nature of involvement  | Report the level or nature of PPI used at various stages of the study                                 | 9                   |

| Section 5: Capture or measurement of PPI impact |                                                                                                                                                                                               |     |
|-------------------------------------------------|-----------------------------------------------------------------------------------------------------------------------------------------------------------------------------------------------|-----|
| 5a: Qualitative evidence of impact              | If applicable, report the methods used to qualitatively explore the impact of PPI in the study                                                                                                | N/A |
| 5b: Quantitative evidence of impact             | If applicable, report the methods used to quantitatively measure or assess the impact of PPI                                                                                                  | N/A |
| 5c: Robustness of measure                       | If applicable, report the rigour of the method used to capture or measure the impact of PPI                                                                                                   | N/A |
| Section 6: Economic assessment                  |                                                                                                                                                                                               |     |
| 6: Economic assessment                          | If applicable, report the method used for an economic assessment of PPI                                                                                                                       | N/A |
| Section 7: Study results                        |                                                                                                                                                                                               |     |
| 7a: Outcomes of PPI                             | Report the results of PPI in the study, including both positive and negative outcomes                                                                                                         | N/A |
| 7b: Impacts of PPI                              | Report the positive and negative impacts that PPI has had on the research, the individuals involved (including patients and researchers), and wider impacts                                   | N/A |
| 7c: Context of PPI                              | Report the influence of any contextual factors that enabled or hindered the process or impact of PPI                                                                                          | N/A |
| 7d: Process of PPI                              | Report the influence of any process factors, that enabled or hindered the impact of PPI                                                                                                       | N/A |
| 7ei: Theory development                         | Report any conceptual or theoretical development in PPI that have emerged                                                                                                                     | N/A |
| 7eii: Theory development                        | Report evaluation of theoretical models, if any                                                                                                                                               | N/A |
| 7f: Measurement                                 | If applicable, report all aspects of instrument development and testing (eg, validity, reliability, feasibility, acceptability, responsiveness, interpretability, appropriateness, precision) | N/A |
| 7g: Economic assessment                         | Report any information on the costs or benefit of PPI                                                                                                                                         | N/A |

| Section 8: Discussion and conclusions     |                                                                                                                                           |       |
|-------------------------------------------|-------------------------------------------------------------------------------------------------------------------------------------------|-------|
| 8a: Outcomes                              | Comment on how PPI influenced the study overall. Describe positive and negative effects                                                   | 31-32 |
| 8b: Impacts                               | Comment on the different impacts of PPI identified in this study and how they contribute to new knowledge                                 | 31-32 |
| 8c: Definition                            | Comment on the definition of PPI used (reported in the Background section) and whether or not you would suggest any changes               | N/A   |
| 8d: Theoretical underpinnings             | Comment on any way your study adds to the theoretical development of PPI                                                                  | N/A   |
| 8e: Context                               | Comment on how context factors influenced PPI in the study                                                                                | N/A   |
| 8f: Process                               | Comment on how process factors influenced PPI in the study                                                                                | N/A   |
| 8g: Measurement and capture of PPI impact | If applicable, comment on how well PPI impact was evaluated or measured in the study                                                      | N/A   |
| 8h: Economic assessment                   | If applicable, discuss any aspects of the economic cost or benefit of PPI, particularly any suggestions for future economic modelling.    | N/A   |
| 8i: Reflections/critical perspective      | Comment critically on the study, reflecting on the things that went well and those that did not, so that others can learn from this study | 32-35 |
